# Supplementary material for: Fructose conversion in the presence of Sn(iv) catalysts exhibiting high selectivity to lactic acid
Source: Royal Society of Chemistry journal article supplement (doi:10.1039/c5ra20881e), 2015-01-01
Supplement: c5ra20881e1.pdf [file c5ra20881e1.pdf]

## Supporting Information

### Fructose Conversion in the Presence of Sn(IV) Catalysts Exhibiting High Selectivity to Lactic Acid

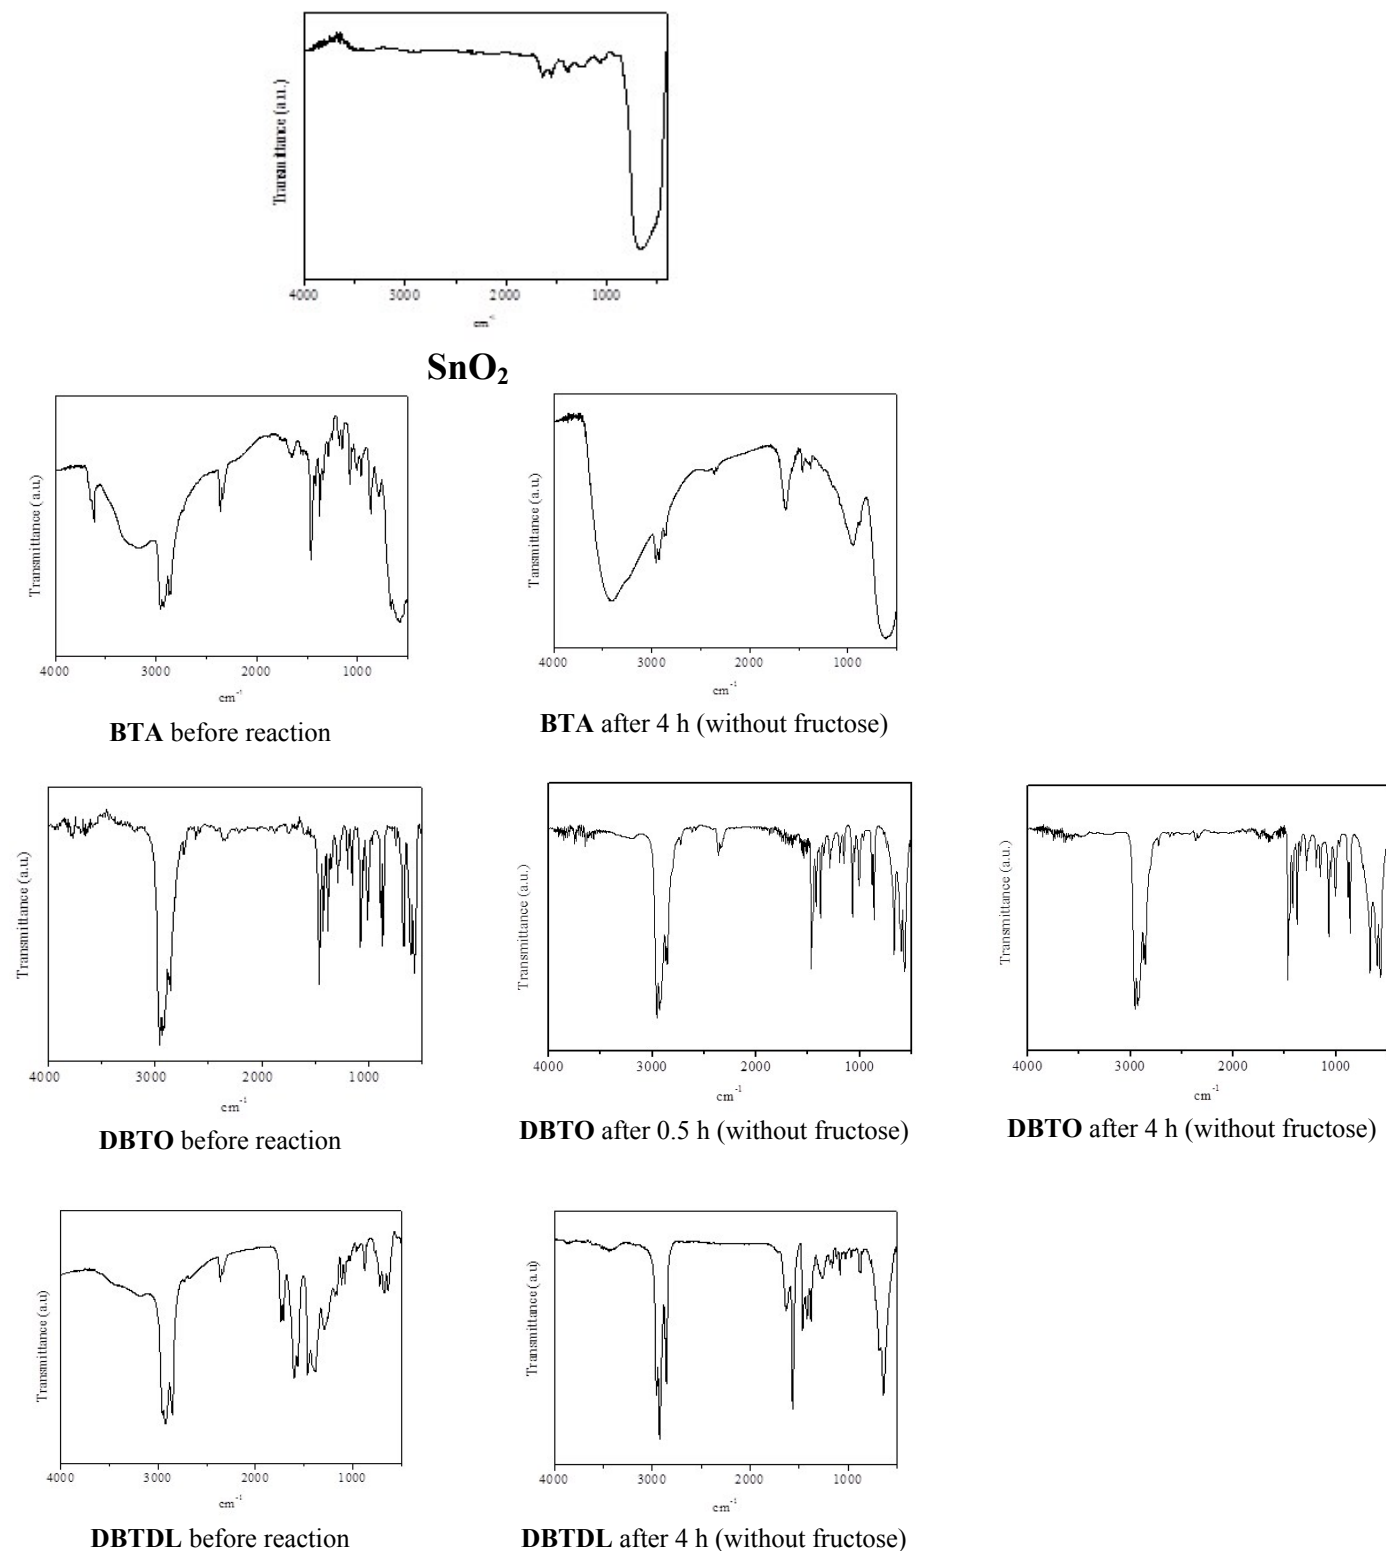

**Fig.S1** Spectra in the medium infrared region of Sn(IV) catalysts, before and after 4 h of hydrolysis (190 °C)

**Table S1.** Soluble products identified from fructose conversion at 190°C (yield (%)), using SnO<sub>2</sub> ( $2.69 \times 10^{-5}$  mol)

| Reaction time (h) | Glucose (%) | 5-HMF (%) | Levulinic Acid (%) | Formic acid (%) | Glyceraldehyde (%) | Dihydroxyacetone (%) | Pyruvaldehyde (%) | Lactic acid (%) | Acetic acid (%) | TOTAL Identified (%) |
|-------------------|-------------|-----------|--------------------|-----------------|--------------------|----------------------|-------------------|-----------------|-----------------|----------------------|
| 0.5               | 1.3         | 44.5      | 1.0                | 4.4             | 0.7                | 0.7                  | 0.9               | 2.0             | 2.3             | 57.9                 |
| 1                 | 1.1         | 48.4      | 2.1                | 6.8             | 0.5                | 2.3                  | 0.9               | 2.8             | 3.4             | 68.4                 |
| 2                 | 1.0         | 45.2      | 5.4                | 10.9            | 0.7                | 0.9                  | 0.7               | 2.6             | 3.4             | 70.7                 |

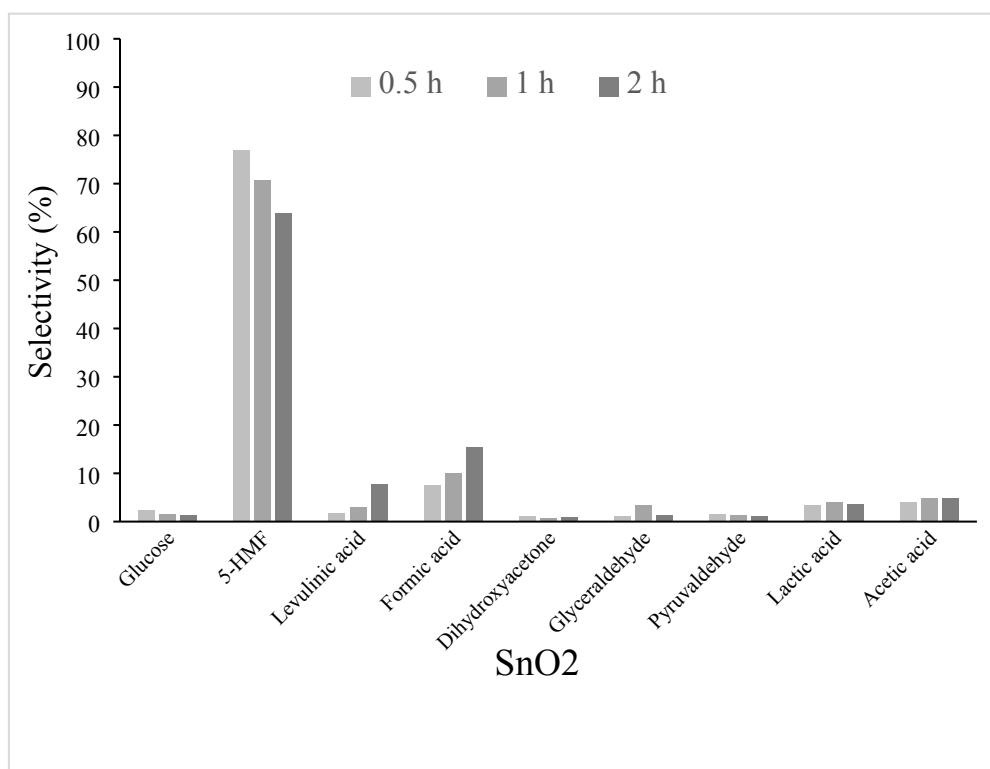

**Fig. S2.** Selectivity to soluble products identified from fructose conversion at 190°C, using SnO<sub>2</sub> ( $2.69 \times 10^{-5}$  mol)
